# Supplementary material for: Quarantine, distress and interpersonal relationships during COVID-19
Source: HighWire-hosted journal article supplement (doi:10.1136/gpsych-2020-100385), 2020-10-21
Supplement: gpsych-2020-100385supp001_data_supplement.pdf [file gpsych-2020-100385supp001_data_supplement.pdf]

Supplementary Table 1:

Association between change in intimate relationship, distress and quarantine status controlling for overall intimate relationship quality (multivariate regression).

|                              | Partner(N=882)<br>(t, P) |
|------------------------------|--------------------------|
| Sex (male/female)            | .17 (.87)                |
| Age                          | -.08 (.94)               |
| General health (low to high) | -.51 (.61)               |
| Quarantine (yes)             | .92 (.36)                |
| K6 score                     | <b>-3.06 (.002)</b>      |
| Relationship quality         | <b>6.59 (.000)</b>       |

Note Figures in bold significant at P<.05
